# Supplementary material for: Predicting secondary organic aerosol phase state and viscosity and its effect on multiphase chemistry in a regional-scale air quality model
Source: Copernicus journal article supplement (doi:10.5194/acp-20-8201-2020), 2020-07-16
Supplement: Supplementary file [file acp-20-8201-2020-supplement.pdf]

Supplement of Atmos. Chem. Phys., 20, 8201–8225, 2020  
<https://doi.org/10.5194/acp-20-8201-2020-supplement>  
© Author(s) 2020. This work is distributed under  
the Creative Commons Attribution 4.0 License.

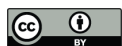

*Supplement of*

## **Predicting secondary organic aerosol phase state and viscosity and its effect on multiphase chemistry in a regional-scale air quality model**

**Ryan Schmedding et al.**

*Correspondence to:* William Vizuite ([vizuite@unc.edu](mailto:vizuite@unc.edu))

The copyright of individual parts of the supplement might differ from the CC BY 4.0 License.

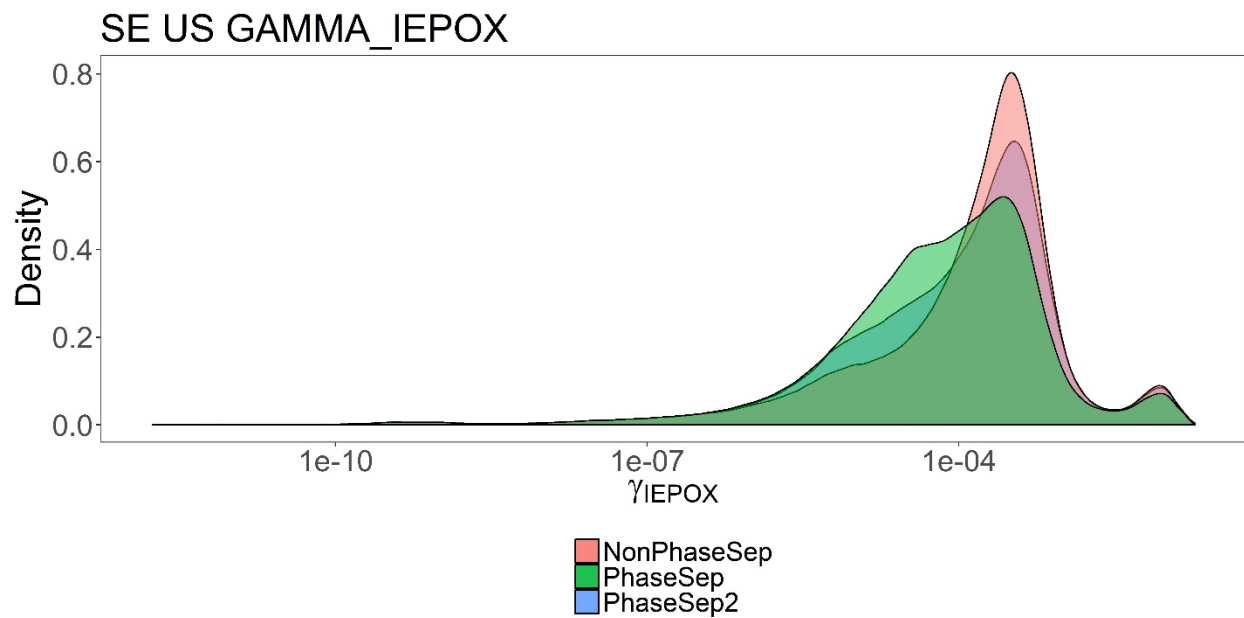

**Figure S1** – For Southeastern United States, Probability distribution of  $\gamma_{IEPOX}$  at the surface level for the *NonPhaseSep* (red), *PhaseSep* (green) and *PhaseSep2* (blue) for SOAS 2013 simulation period.

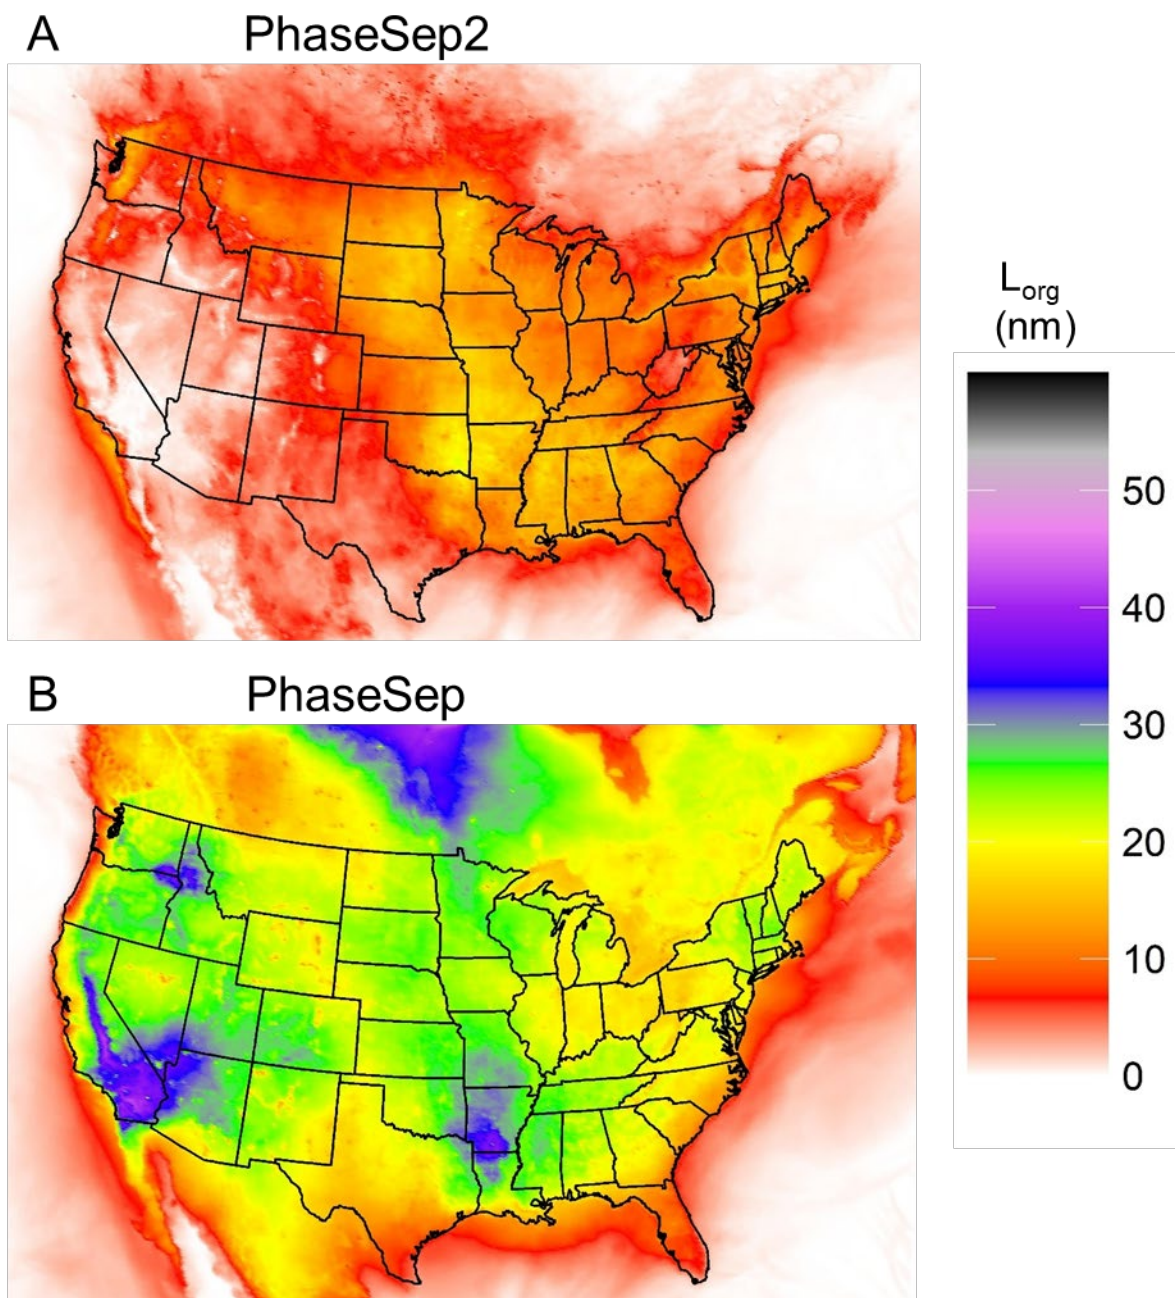

**Figure S2** – Average organic coating thickness ( $l_{org}$  in nm) at the surface level for **(A)** *PhaseSep2* and **(B)** *PhaseSep* cases for SOAS 2013 simulation period.

A NonPhaseSep

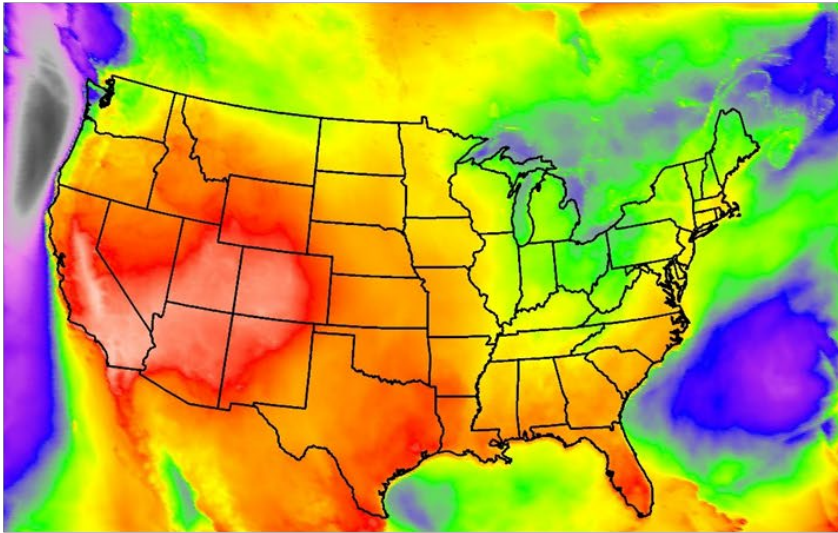

B PhaseSep

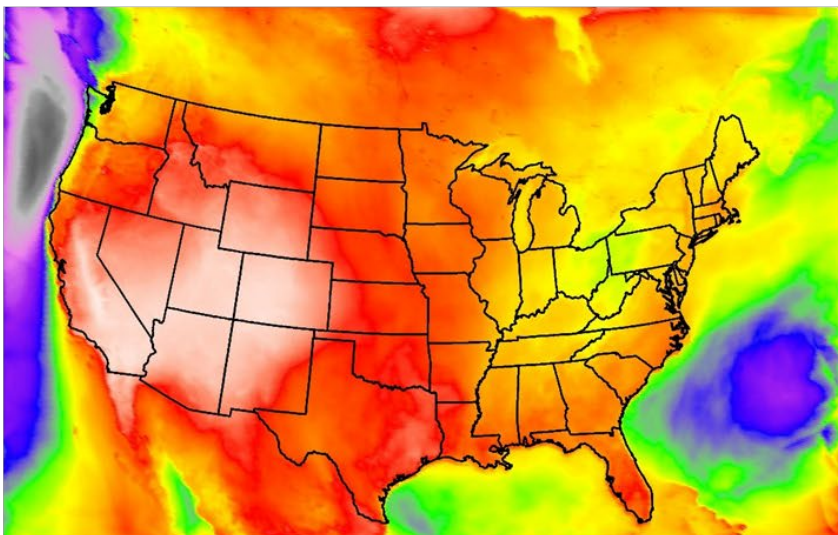

C PhaseSep2

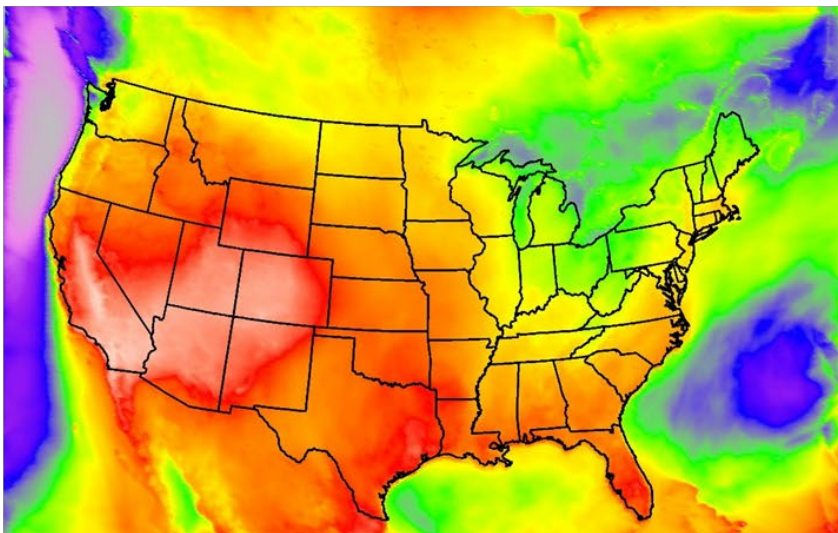

fraction

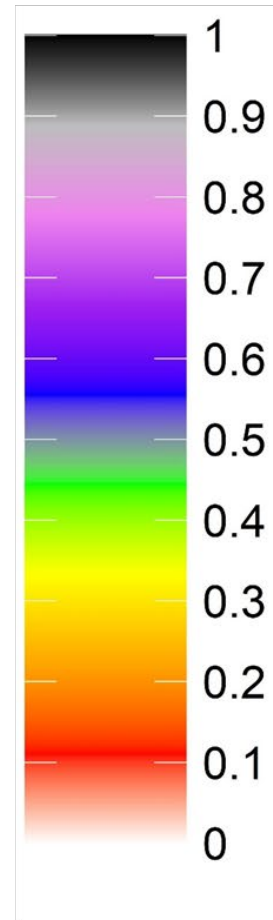

**Figure S3** – Average fraction of IEPOX-derived SOA in biogenic SOA mass at the surface level for: (A) *NonPhaseSep*, (B) *PhaseSep* and (C) *PhaseSep2* case for SOAS 2013 simulation period.

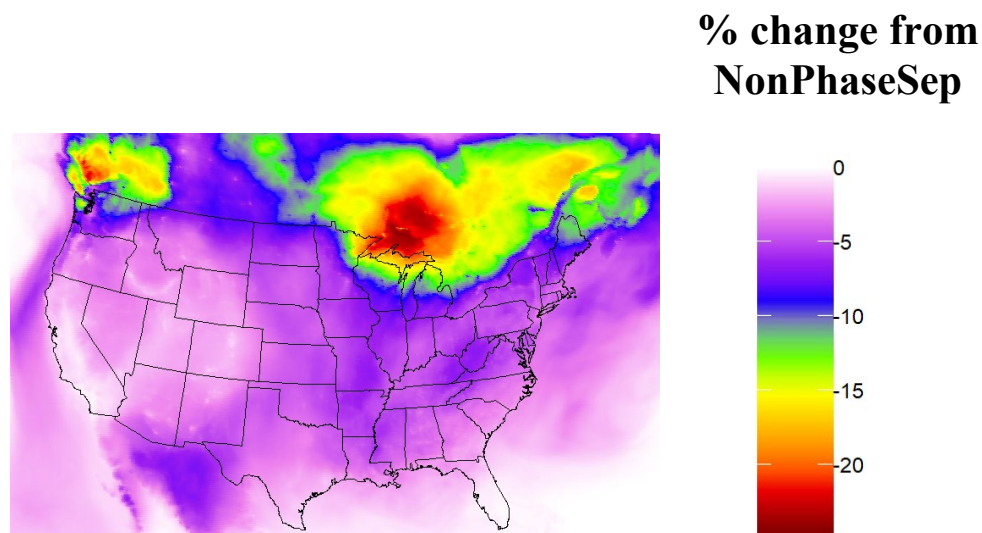

**Figure S4** – Spatial map of the mean percent relative change of surface PM<sub>2.5</sub> organic carbon (OC) mass in *PhaseSep* case relative to the *NonPhaseSep* Simulation.

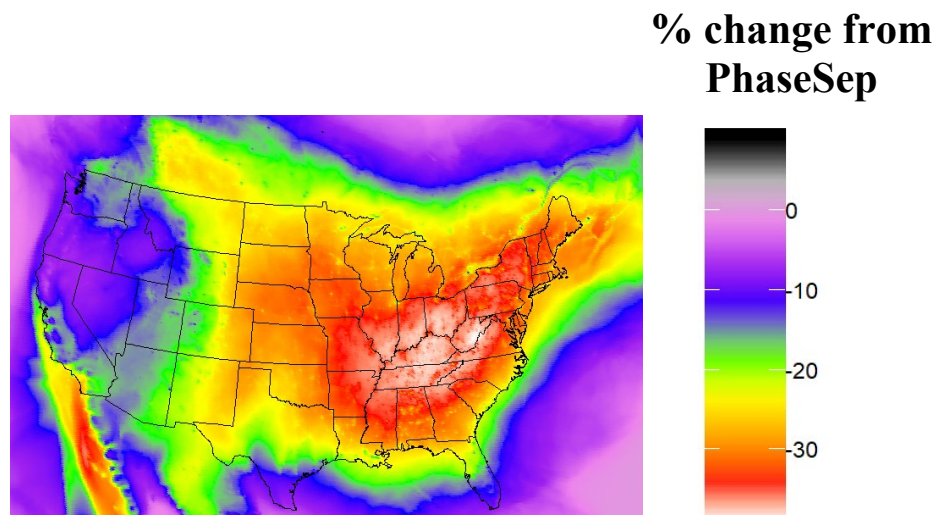

**Figure S5** – Spatial map of the mean percent relative change of PM<sub>2.5</sub> sulfate mass at surface in *Emission Reduction* sensitivity case relative to the *PhaseSep* Simulation.

**Table S1** – Comparison of different simulations on phase separation frequencies (for Continental US) and model performance in isoprene-abundant southeastern United States (rural Centreville, AL and urban Atlanta sites).

| <b>Parameter</b> (units)                                           |                                                                           | <i>PhaseSep</i> | <i>PhaseSep2</i> | <i>Emissions Reductions</i> | <i>HighHorg</i> |
|--------------------------------------------------------------------|---------------------------------------------------------------------------|-----------------|------------------|-----------------------------|-----------------|
| <b>For Continental US</b>                                          | <b>LLPS</b><br>Frequency (%)                                              | 13.7            | 13.7             | 13.5                        | 12.5            |
|                                                                    | <b>SSPS</b><br>Frequency (%)                                              | 54.8            | 29               | 57                          | 55.8            |
| <b>NMB (%)</b> ,<br>compared to<br>SEARCH<br>PM <sub>2.5</sub> OC) | <b>Rural</b><br><b>Centreville,</b><br><b>AL forest site</b>              | -36             | -33              | -44                         | -32             |
|                                                                    | <b>Urban</b><br><b>Jefferson</b><br><b>Street, Atlanta</b><br><b>site</b> | -21             | -18              | -29                         | -18             |
